# Supplementary material for: Low-Energy X-Ray Intraoperative Radiation Therapy (Lex-IORT) for Resected Brain Metastases: A Single-Institution Experience
Source: MDPI journal article supplement (doi:10.3390/cancers15010014), 2022-12-20
Supplement: s1 [file s1]

Supplementary Materials

# Low-Energy X-Ray Intraoperative Radiation Therapy (Lex-IORT) for Resected Brain Metastases: A Single-Institution Experience

Christian D. Diehl, Steffi U. Pigorsch, Jens Gempt, Sandro M. Krieg, Silvia Reitz, Maria Waltenberger, Melanie Barz, Hanno S. Meyer, Arthur Wagner, Jan Wilkens, Benedikt Wiestler, Claus Zimmer, Bernhard Meyer and Stephanie E. Combs

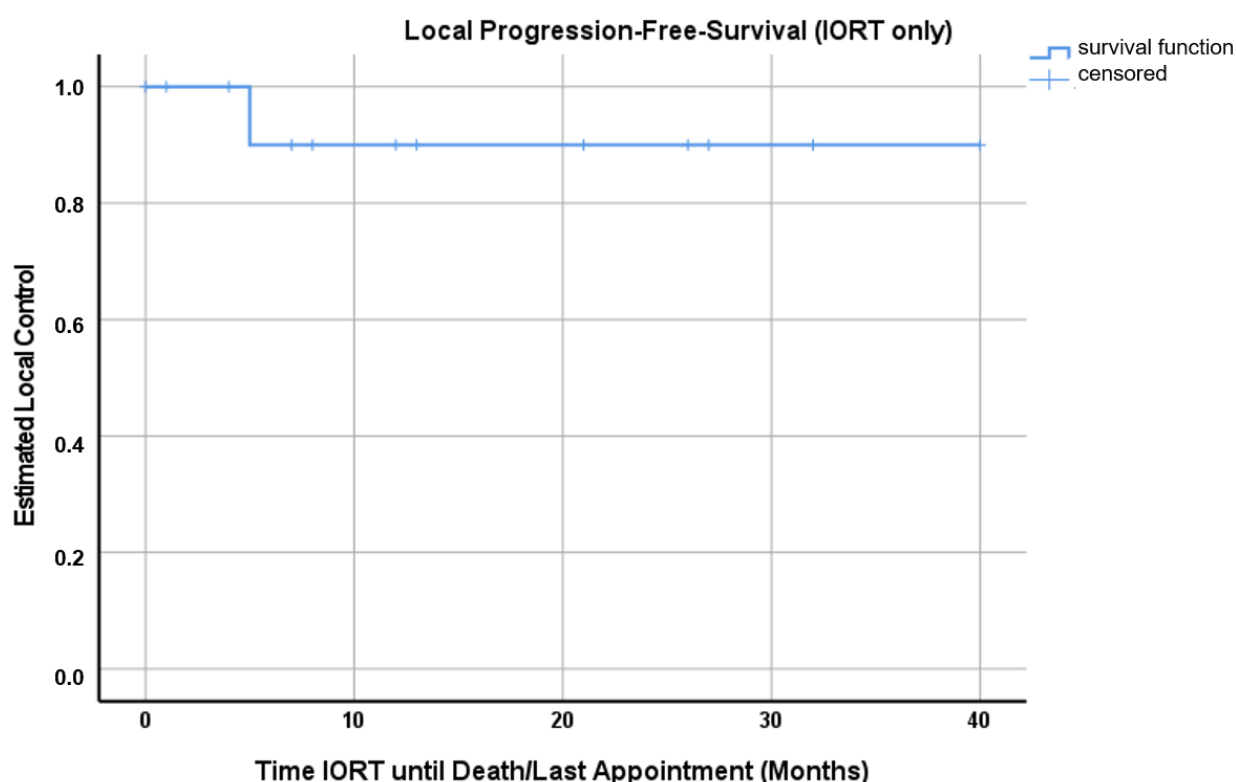

**Figure S1.** Kaplan-Meier curve for local progression free survival when excluding patients receiving additional RT post IORT. Estimated LC is 90.0% (95%-CI 71.4 – 100%).
